# Supplementary material for: Comparative Analysis of Antioxidant System and Salt-Stress Tolerance in Two Hibiscus Cultivars Exposed to NaCl Toxicity
Source: MDPI journal article supplement (doi:10.3390/plants12071525), 2023-03-31
Supplement: s1 [file s1]

**Supplementary Table S1** Primer sequences for quantitative real-time PCR.

| Gene ID      | Gene name | Primer sequence (5'-3')                             |
|--------------|-----------|-----------------------------------------------------|
| KM117267.1   | 18s RNA   | F:AACACGGACCAAGGAGTCTG<br>R:GCCTCCACCAGAGTTTCCTC    |
| LOC120201429 | AOX2      | F:ATGACGTTTCATGGAGGTGTCC<br>R:TCCTCAAGGTATCCCACCACT |
| HO762719     | ERD3      | F: TGTTATCGACGATCCCCTATGG<br>R: TGGCTCTCGGCAGTGAAGA |
